# Supplementary material
Source: PubMed Central journal article supplement (PMC7124909)

The following are supplemental materials and will be published online only

**Supplemental Figure 1 Phylogenetic reconstruction of the outbreak cluster.**

Nodes represent each of the sequenced cases (N = 4). The SNP phylogeny was constructed using SNIPPY (<https://github.com/tseemann/snippy>).

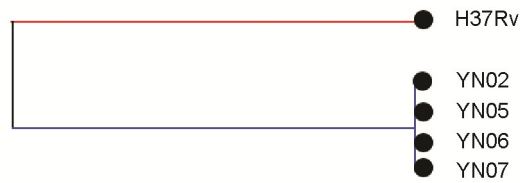

Supplement: tpmd190533.SD1.pdf [file tpmd190533.SD1.pdf]
